# Supplementary material
Source: ML conference proceedings conference paper supplement (https://aclanthology.org/D19-1513)
Supplement: Attachment [file D19-1513.Attachment.zip]

| Dataset | market                                                             | crime                                                                   | education                                                       | political                                                                      | economy                                                                    | law                                                                      | weather                                                          | music                                                                    |
|---------|--------------------------------------------------------------------|-------------------------------------------------------------------------|-----------------------------------------------------------------|--------------------------------------------------------------------------------|----------------------------------------------------------------------------|--------------------------------------------------------------------------|------------------------------------------------------------------|--------------------------------------------------------------------------|
| APNEWS  | trading<br>billion<br>revenue<br>cents<br>zacks                    | shot<br>wounded<br>murder<br>guilty<br>sentenced                        | education<br>students<br>community<br>college<br>teachers       | democratic<br>primary<br>election<br>congressional<br>race                     | economy<br>crisis<br>Europe<br>Eurozone<br>bailout                         | case<br>judge<br>supreme<br>trial<br>dismissed                           | rain<br>kilometers<br>weather<br>winds<br>wildfire               | songs<br>dance<br>comedy<br>musical<br>fans                              |
| IMDB    | <b>war</b><br>war<br>weapons<br>soldiers<br>nations<br>iraq        | <b>crime</b><br>kidnap<br>murdered<br>attacked<br>shot<br>kill          | <b>video</b><br>dvd<br>vhs<br>video<br>saw<br>channel           | <b>effect</b><br>effects<br>cinematography<br>photography<br>visual<br>editing | <b>name</b><br>robinson<br>grant<br>dunne<br>davis<br>edwards              | <b>negative</b><br>poorly<br>unfunny<br>horrible<br>scary<br>sucks       | <b>detective</b><br>agatha<br>book<br>christie<br>holmes<br>eyre | <b>acting</b><br>oscar<br>award<br>william<br>errol<br>freeman           |
| BNC     | <b>politics</b><br>minister<br>prime<br>union<br>soviet<br>elected | <b>sports</b><br>league<br>championship<br>saturday<br>manchester<br>St | <b>body</b><br>eyes<br>walked<br>lips<br>shook<br>sat           | <b>finance</b><br>income<br>agencies<br>tax<br>sector<br>expenditure           | <b>research</b><br>factors<br>research<br>context<br>expertise<br>analysis | <b>government</b><br>government<br>state<br>labour<br>council<br>nation  | <b>art</b><br>music<br>album<br>art<br>picture<br>guitar         | <b>education</b><br>schools<br>students<br>education<br>learn<br>courses |
| Yahoo   | <b>sports</b><br>cup<br>football<br>win<br>match<br>team           | <b>computer</b><br>windows<br>download<br>xp<br>software<br>file        | <b>music</b><br>music<br>song<br>songs<br>band<br>listen        | <b>polities</b><br>president<br>bush<br>george<br>vote<br>cliton               | <b>health</b><br>eat<br>weight<br>fat<br>pounds<br>water                   | <b>education</b><br>education<br>school<br>college<br>high<br>university | <b>family</b><br>guy<br>sex<br>women<br>men<br>ladies            | <b>business</b><br>credit<br>account<br>card<br>money<br>bank            |
| Yelp    | <b>commerce</b><br>store<br>shop<br>helpful<br>job<br>customer     | <b>food</b><br>fried<br>fries<br>soup<br>sandwich<br>rice               | <b>customer</b><br>customer<br>buy<br>care<br>money<br>business | <b>hotel</b><br>room<br>hotel<br>service<br>car<br>breakfast                   | <b>positive</b><br>great<br>nice<br>excellent<br>good<br>spot              | <b>others</b><br>est<br>und<br>ist<br>es<br>pour                         | <b>negative</b><br>rude<br>do<br>worst<br>horrible<br>worse      | <b>wine</b><br>wine<br>beer<br>great<br>coffee<br>good                   |

Table 1: Top-5 words in 8 topics from our model on APNEWS, IMDB, BNC, Yahoo and Yelp. Boldface words are names of the topics summarized by us.

| Topic                  | Question                                                        | Answer                                                                                       |
|------------------------|-----------------------------------------------------------------|----------------------------------------------------------------------------------------------|
| Science & Mathematics  | how do we get smarter?                                          | by gaining intelligence and knowledge so then leading to know more things u see how it work. |
| Society & Culture      | how do you cope with god?                                       | god knows how to make it feel more than god you can do.                                      |
| Health                 | how do i increase our metabolism?                               | by eating in the morning and eat healthy food.                                               |
| Education & Reference  | how do you spell grammar?                                       | by read the word language and grammar.                                                       |
| Computers              | how do i delete the password?                                   | by delete cookies and delete it.                                                             |
| Sports                 | how do you get into world cup?                                  | i do n't think i can going to be.                                                            |
| Business & Finance     | how do you earn money?                                          | by have a credit card and you can get money.                                                 |
| Entertainment & Music  | can anyone tell me where i can find out where i can find a job? | by taking a hot bath and taking a hot bath.                                                  |
| Family & Relationships | how do you cope with sex?                                       | if you are in love with you , you can get married to you.                                    |
| Politics & Government  | how many states have you smoke?                                 | it depends on how many people are in your country.                                           |

Table 2: A topic transfer example on Yahoo dataset.

| Topic                  | Question                                                                                | Answer                                                                    |
|------------------------|-----------------------------------------------------------------------------------------|---------------------------------------------------------------------------|
| Health                 | im getting a cold once a month for the past 8 months. why?                              | may not be a cold , you may have allergies. maybe check with your doctor. |
| Society & Culture      | i need a job for a job. what is the best way to get a job?                              | it depends on what you are looking for.                                   |
| Science & mathematics  | i need a word for a sentence. what is the meaning of word?                              | it means that you are referring to a word that means word.                |
| Sports                 | i have a question for answer. whos going to win a super bowl a week?                    | i think it 's a good question.                                            |
| Entertainment & Music  | anyone know a good way to get a cold air force?                                         | i have a lot of people that have a lot of time. i do n't know.            |
| Computers              | i have a problem with my yahoo toolbar . the problem is blocking the internet explorer? | you can delete the password and password.                                 |
| Education & Reference  | i need a job in my college school. what?                                                | i think it depends on the state.                                          |
| Business & Finance     | i need a loan for a loan. what is the way to get money?                                 | credit card is a good money.                                              |
| Family & Relationships | i need a girl to be a woman. what is the relationship between sex and marriage?         | i do n't know if it is a relationship between sex and love.               |
| Politics & Government  | i need a lawyer to make a house. what is the best way to get rid of them?               | the police officer. you can get a lawyer.                                 |

Table 3: A topic transfer example on Yahoo dataset.

| Topic                  | Question                                                                                        | Answer                                                                                                                |
|------------------------|-------------------------------------------------------------------------------------------------|-----------------------------------------------------------------------------------------------------------------------|
| Sports                 | can u tell me where i can download nfl video clips so i can transfer them to my psp?            | nfl denver broncos highlights , greatest games of 06 , greatest catches between 2000 & 2006 google video or you tube. |
| Society & Culture      | do u wan na date me to date my birthday date birthday birthday birthday?                        | i want to date my birthday party.                                                                                     |
| Science & reference    | what are the main differences between english language?                                         | i think it 's language.                                                                                               |
| Health                 | can anyone tell me where i can find out where i can find out about doctor?                      | go to the hospital.                                                                                                   |
| Entertainment & Music  | can anyone tell me where i can find out where i can watch movies?                               | go to the mall mall.                                                                                                  |
| Computers              | can anyone tell me where i can find pics of my friends list on myspace and i want to know?      | go to <a href="http://images.google.com/">http://images.google.com/</a> search                                        |
| Education & Reference  | can anyone tell me where i can find out where i can find out about school in columbus?          | go to the school.                                                                                                     |
| Business & Finance     | can anyone tell me where i can find out where i can find a job?                                 | go the the bank.                                                                                                      |
| Family & Relationships | can anyone tell me where i can find out where i can watch movies on my wedding wedding concert? | Its not clear.                                                                                                        |
| Politics & Government  | dou think george bush will be able to get president to go to jail for president ?               | he 's in office in office in january 2009.                                                                            |

Table 4: A topic transfer example on Yahoo dataset.
